# Supplementary material for: BRASSINOSTEROID-SIGNALING KINASE 3, a plasma membrane-associated scaffold protein involved in early brassinosteroid signaling
Source: PubMed Central journal article supplement (PMC6336344; doi:10.1371/journal.pgen.1007904), 2019-01-07
Supplement: pgen.1007904.s008.pdf [file pgen.1007904.s008.pdf]

**S1 Table. T-DNA insertion mutants of the *BSK* family genes.**

| <b>Genes</b>     | <b>Mutants</b>               | <b>T-DNA insertion positions</b> |
|------------------|------------------------------|----------------------------------|
| <i>BSK1</i>      | <i>bsk1-1</i> (GABI_180B09)  | 5' UTR                           |
| <i>BSK2</i>      | <i>bsk2-1</i> (SALK_001600)  | Exon 5                           |
| <i>BSK3</i>      | <i>bsk3-1</i> (SALK_096500C) | Intron 1                         |
| <i>BSK4</i>      | <i>bsk4-1</i> (SALK_032845C) | Intron 6                         |
| <i>BSK5</i>      | <i>bsk5-1</i> (SALK_074467)  | Intron 7                         |
| <i>BSK6</i>      | <i>bsk6-1</i> (SALK_063711C) | Exon 5                           |
| <i>BSK8</i>      | <i>bsk8-1</i> (SALK_077982)  | Exon 4                           |
| <i>BSK10</i>     | <i>bsk10-1</i> (SALK_016806) | Exon 5                           |
| <i>BSK11</i>     | <i>bsk11-1</i> (GABI_063A06) | Exon 7                           |
| <i>BSK12/SSP</i> | <i>ssp-2</i> (SALK_051462)   | Intron 2                         |
