# Supplementary material for: BRASSINOSTEROID-SIGNALING KINASE 3, a plasma membrane-associated scaffold protein involved in early brassinosteroid signaling
Source: PubMed Central journal article supplement (PMC6336344; doi:10.1371/journal.pgen.1007904), 2019-01-07
Supplement: pgen.1007904.s009.pdf [file pgen.1007904.s009.pdf]

**S2 Table. PCR primers used in this study.**

| <b>Primers</b>                   | <b>Sequences (5' to 3' direction)</b> |
|----------------------------------|---------------------------------------|
| <b>RT-PCR primers</b>            |                                       |
| ACTIN2-FW                        | GGCTGAGGCTGATGATATTC                  |
| ACTIN2-RV                        | TCTGTGAACGATTCTGGAC                   |
| BSK3-HA-FW                       | CTTTAGAGAGGCCATCGAGTG                 |
| HA-RV                            | CGTAATCTGGAACATCGTATGG                |
| BSU1-EYFP-FW                     | GAAAGATTCGCTGACGGACGGC                |
| EYFP-RV                          | CAGCTTGCCGTAGGTGGCATCG                |
| BSK3-FW                          | GATGGGAGGTCAATGCTCTAGCC               |
| BSK3-RV                          | ACTGTCGTGAATCAGGCCAGG                 |
| <b>Mutant genotyping primers</b> |                                       |
| BSK1-GABI_180B09-FW              | CTACTCTATTTAGAAGGCACGTC               |
| BSK2-SALK_001600-FW              | GGGATATGCGTGTTCTGAATCGC               |
| BSK3-SALK_096500C-FW             | GAGTCTAACTAGTCGAGTTGAC                |
| BSK4-SALK_032845C-RV             | AGATGTCAGGCGTACTAACTCC                |
| BSK5-SALK_074467-RV              | GTTTCATGTACATACCTCATTGTC              |
| BSK6-SALK_063711C-RV             | GGTCAAGCGCCTGTATAGAAGC                |
| BSK8-SALK_077982-RV              | TGAAACCTTAGCTGTCAGCTGG                |
| BSK10-SALK_016806-RV             | CGGCATCTCCATGCTTCTTG                  |
| BSK11-GABI_063A06-FW             | CAAACATTTCTGAATCTGCTATTGA             |
| BSK12-SALK_051462-RV             | GAAGAGGCACAAAGAGTAGGG                 |
| BRI1-FW                          | CTCCGGTCCGATTCTCCCAAATC               |

|                                          |                                               |
|------------------------------------------|-----------------------------------------------|
| BRI1-RV                                  | GAACCAGAGATATCGTTATGACCC                      |
| SALK-LBb1.3                              | ATTTTGCCGATTTTCGGAAC                          |
| GABI-Kat-LB                              | ATAATAACGCTGCGGACATCTACATTTT                  |
| bin2-1-FW                                | CACGATTCTACCGTGCACCCGAG                       |
| bin2-1-RV                                | GACCAGTTCAGGTGATGATCCAGC                      |
| <b>Site-directed mutagenesis primers</b> |                                               |
| BSK3 <sup>K86R</sup> -FW                 | CCAAAAGAAGATTGCTGTCAGGCGTTTTACTAGAATG<br>GC   |
| BSK3 <sup>K86R</sup> -RV                 | GCCATTCTAGTAAAACGCCTGACAGCAATCTTCTTTT<br>GG   |
| BSK3 <sup>R156K</sup> -FW                | CCTATGAAATGGACTATGAAGCTACGAGTTGTTTTAT<br>ATC  |
| BSK3 <sup>R156K</sup> -RV                | GATATAAAACAACCTCGTAGCTTCATAGTCCATTTCATA<br>GG |
| BSK3 <sup>G226E</sup> -FW                | GAATATCTACGAACTGAGAGAATTACTCCAGAG             |
| BSK3 <sup>G226E</sup> -RV                | CTCTGGAGTAATTCTCTCAGTTCGTAGATATTC             |
| BSK3 <sup>G238S</sup> -FW                | GTGTAATATACAGCTTTAGCACTCTTCTGCTTGATC          |
| BSK3 <sup>G238S</sup> -RV                | GATCAAGCAGAAGAGTGCTAAAGCTGTATATTACAC          |
| BRI1 <sup>K911E</sup> -FW                | GCGCGGTGGCTATCGAGAACTGATTCATG                 |
| BRI1 <sup>K911E</sup> -RV                | CATGAATCAGTTTCTCGATAGCCACCGCGC                |
| BIN2 <sup>K69R</sup> -FW                 | GAAACCGTGGCGATAAGGAAGTTTTGCAAG                |
| BIN2 <sup>K69R</sup> -RV                 | CTTGCAAACCTTCCTTATCGCCACGGTTTC                |
